# Supplementary material for: Prominent electronic effect in iridium-alloy-skinned nickel nanoparticles boosts alkaline hydrogen electrocatalysis
Source: Royal Society of Chemistry journal article supplement (doi:10.1039/d3ee02382f), 2023-01-01
Supplement: d3ee02382f1.pdf [file d3ee02382f1.pdf]

## Electronic Supplementary Information for

### Prominent Electronic Effect in Iridium-Alloy-Skinned Nickel Nanoparticles

#### Boosts Alkaline Hydrogen Electrocatalysis

Jie Xu<sup>a,d,‡</sup>, Xuyan Wang<sup>a,b,‡</sup>, Xinnan Mao<sup>a,b,‡</sup>, Kun Feng<sup>a,b</sup>, Jiabin Xu<sup>a,b</sup>, Jun Zhong<sup>a,b\*</sup>, Lu Wang<sup>a,b\*</sup>,  
Na Han<sup>a,b\*</sup> and Yanguang Li<sup>a,b,c\*</sup>

<sup>a</sup> Institute of Functional Nano & Soft Materials (FUNSOM), Soochow University, Suzhou, 215123  
China

<sup>b</sup> Jiangsu Key Laboratory for Advanced Negative Carbon Technologies, Soochow University,  
Suzhou 215123, China

<sup>c</sup> Macao Institute of Materials Science and Engineering (MIMSE), MUST-SUDA Joint Research  
Center for Advanced Functional Materials, Macau University of Science and Technology, Taipa  
999078, Macau SAR, China

<sup>d</sup> College of Chemistry and Materials Engineering, Wenzhou University, Wenzhou, Zhejiang 325035,  
China

‡ These authors contributed equally.

Correspondence to: [yanguang@suda.edu.cn](mailto:yanguang@suda.edu.cn), [hanna@suda.edu.cn](mailto:hanna@suda.edu.cn), [lwang22@suda.edu.cn](mailto:lwang22@suda.edu.cn),  
[jzhong@suda.edu.cn](mailto:jzhong@suda.edu.cn)

## Experimental section

### Chemicals and materials.

All reagents are analytical grade and used as received without further purification. Nickel(II) acetylacetonate ( $\text{Ni}(\text{acac})_2$ , 95%) and iridium(III) acetylacetonate ( $\text{Ir}(\text{acac})_3$ , Ir 37.5% min) were purchased from Alfa Aesar. Oleylamine (OAm, C18: 80–90%) was purchased from Shanghai Macklin Biochemical Co., Ltd. Cyclohexane ( $\geq 99.7\%$ ) was purchased from Sinopharm Chemical Reagent Co., Ltd. Ketjenblack conductive carbon black (KB, Carbon ECP 200L) was purchased from Lion Specialty Chemicals Co., Ltd. Commercial PtRu/C (20 wt% platinum and ruthenium on Vulcan XC72), Pt/C (20 wt% platinum on Vulcan XC72) and Ir/C (20 wt% iridium on Vulcan XC72) were purchased from Premetek Co. Perfluorinated resin solution (Nafion 1100EW, 5 wt. % in lower aliphatic alcohols and water, contains 15-20% water) was purchased from Sigma-Aldrich. Deionized water was prepared with a Milli-Q purification system and used throughout all the experiments.

### Material synthesis

#### Preparation of Ni@IrNi

To prepare Ni@IrNi, 20 mg of  $\text{Ni}(\text{acac})_2$  and 7 mg of  $\text{Ir}(\text{acac})_3$  were first dissolved in 15 mL of oleylamine and vigorously stirred for 30 min. The solution was transferred into a 25 mL autoclave, and heated at 200°C for 24 h in an oven. The obtained product was isolated, washed by ethanol and mixed with a calculated amount of KB in cyclohexane. The mixture was then washed thoroughly with ethanol and water, and finally lyophilized to yield the named product. Pure Ni nanoparticles, Ni@IrNi-1 and Ni@IrNi-3 were prepared by changing the  $\text{Ir}(\text{acac})_3$  precursor mass to 0 mg, 3 mg,

10 mg, respectively under otherwise identical conditions. To etch its metallic Ni cores, Ni@IrNi was soaked in 10 wt% HCl for 12 h, and washed with distilled water to afford e-Ni@IrNi for control experiments.

### **Structure characterizations**

Powder XRD was conducted on a PANalytical X-ray diffractometer. TEM/HAADF imaging and EDS mapping were carried out on a Thermo Scientific Talos F200X scanning/transmission electron microscope under 200 kV. XPS results were obtained on a Thermo Scientific K-Alpha X-ray photoelectron spectrometer. X-ray absorption spectroscopy (XAS) experiments were performed at the Shanghai Synchrotron Radiation Facility (SSRF, 14W). Ir L<sub>3</sub>-edge XANES and EXAFS spectra were collected from ~200 eV below to ~800 eV above the Ir L<sub>3</sub>-edge in the transmission mode. Ni K-edge XANES and EXAFS spectra were collected from ~200 eV below to ~800 eV above the Ni K-edge in the transmission mode. ICP results were analyzed using an Aurora M90 inductively coupled plasma optical emission spectrometer.

### **Electrochemical measurements**

All the electrochemical experiments were conducted using a three-electrode cell system with a glassy carbon rotating disk electrode (RDE, Pine Instruments) as the working electrode, a saturated calomel electrode (SCE) as the reference electrode, and a graphite rod as the counter electrode. All the potentials were referenced to the reversible hydrogen electrode (RHE) and compensated for iR drop. For the preparation of the working electrode, 1 mg of Ni@IrNi, 500  $\mu$ L of ethanol and 7  $\mu$ L of 5 wt%

Nafion solution were mixed and sonicated for 1 h to form a homogeneous catalyst ink. Then, 5  $\mu\text{L}$  of ink was dropcast onto the pre-polished RDE to form a smooth catalyst film with an Ir loading of 6.25  $\mu\text{g cm}^{-2}$ . To further lower the catalyst loading, 1 mg of Ni@IrNi, 2 mg of KB, 1000  $\mu\text{L}$  of ethanol, and 8  $\mu\text{L}$  of 5 wt% Nafion solution were mixed and sonicated, and 4  $\mu\text{L}$  of the catalyst ink was dropcast onto the RDE. For reference samples, 1 mg of 20 wt% Pt/C, 20 wt% Ir/C or 20 wt% PtRu/C was dispersed in 500  $\mu\text{L}$  of ethanol and 6  $\mu\text{L}$  of 5 wt% Nafion solution. After sonicated for 1 h, 5  $\mu\text{L}$  of the ink was dropcast onto the RDE to achieve a metal loading of 10  $\mu\text{g cm}^{-2}$ .

The electrochemical HOR/HER tests were carried out in a  $\text{H}_2$ -saturated 0.1 M/1 M KOH or 0.1 M PBS electrolyte. Prior to measurements, the electrolyte was bubbled with 99.999%  $\text{H}_2$  for 40 min to reach its saturation. The bubbling continued during HOR and HER measurements. HOR polarization curves were collected at different electrode rotating speeds with a scan rate of 5  $\text{mV s}^{-1}$ . HER polarization curves were collected at 1600 rpm with a scan rate of 10  $\text{mV s}^{-1}$ .

The kinetic current density ( $j_k$ ) was obtained via the Koutecky–Levich (K–L) equation:

$$\frac{1}{j} = \frac{1}{j_k} + \frac{1}{j_d} = \frac{1}{j_k} + \frac{1}{BC_0\omega^{1/2}}$$

where  $j$  is the measured current density which can be deconvoluted into  $j_k$  and diffusion limited current density ( $j_d$ ) components,  $B$  is the Levich constant,  $C_0$  is the solubility of  $\text{H}_2$  in the electrolyte, and  $\omega$  is the angular velocity of the rotating disk electrode. By plotting  $j^{-1}$  with respect to  $\omega^{-1/2}$ , and extrapolating the linear fitting to  $\omega^{-1/2} = 0$ , we derived  $j_k$  at  $\eta = 50$  mV as described in our main text. The exchange current density ( $j_0$ ) was calculated from the linear fitting of the micro-polarization region, where  $j$  could be approximated as  $j_k$ :

$$j = j_k = j_0 \frac{\eta F}{RT}$$

where  $\eta$  is the overpotential,  $F$  is the Faraday's constant ( $96485 \text{ C mol}^{-1}$ ),  $R$  is the universal gas constant ( $8.314 \text{ J mol}^{-1} \text{ K}^{-1}$ ), and  $T$  is the operating temperature (300 K).

## Computational methods

All the DFT calculations were performed using the revised Perdew-Burke-Ernzerhof functionals (RPBE) of generalized gradient approximation (GGA) implemented in the Vienna Ab-initio Simulation Package (VASP) code (*Phys. Rev. B* **1999**, *59*, 7413; *Phys. Rev. B* **1996**, *54*, 11169; *Comput. Mater. Sci.* **1996**, *6*, 15). The projector-augmented wave (PAW) method was applied to describe the electron-ion interactions (*Phys. Rev. B* **1993**, *47*, 558; *Phys. Rev. B* **1994**, *50*, 17953). A kinetic energy cutoff for the plane wave expansions was set to be 400 eV. The method of Methfessel-Paxton (MP) was applied, and the width of the smearing was chosen as 0.2 eV. A  $3 \times 3$  supercell with four atomic layers was used to construct the Ni (111) surface and Ir (111) surface. Two bottom layers were fixed at their bulk lattice parameters. In the first layer of Ni (111), six Ni atoms were replaced by Ir to model Ni@IrNi with the IrNi alloy surface. More than 10 Å of vacuum space was used to avoid the interaction of the adjacent images. We applied an additional dipole correction along the  $z$ -axis to remove spurious energy contributions arising from the asymmetric slab model. For sampling the reciprocal space,  $\mathbf{k}$ -points of  $\Gamma$ -centered  $4 \times 4 \times 1$  and  $3 \times 3 \times 1$  were used for the calculation of Ni@IrNi and Ir (111), respectively. To simulate the gaseous molecules, electronic structure calculations were performed in a  $15 \text{ \AA} \times 15 \text{ \AA} \times 15 \text{ \AA}$  vacuum box with a Fermi smearing of 0.05 eV. The  $\Gamma$ -point was adopted for sampling the Brillouin zone of the simulation cell. All the structures were fully relaxed until all the forces were less than  $0.03 \text{ eV} \cdot \text{\AA}^{-1}$ .

We employed the double-reference method to evaluate the influence of solvation and pH on the reaction energetics (*ACS Catal.* **2019**, *9*, 5567; *J. Phys. Chem. C* **2020**, *124*, 12016; *ACS Catal.* **2020**, *10*, 12148). It was modeled as implemented by the Hennig group in the VASPsol code (*J. Chem. Phys.* **2014**, *140*, 084106; *J. Chem. Phys.* **2019**, *151*, 234101). The relative permittivity of the electrolyte was set to be 78.36 (the dielectric constant of water at  $T = 298.15$  K). A Debye screening length of 9.61 Å was chosen, corresponding to a bulk ion concentration of 0.1 M KOH at  $T = 298.15$  K. The cavity setting in VASPsol was turned off to avoid numerical instabilities (*ACS Catal.* **2019**, *9*, 920). The electric potential of the slab referenced to the standard hydrogen electrode (SHE) was calculated as:

$$U_{\text{SHE}}/\text{V} = -4.60 - \varphi_q/\text{eV}$$

where  $\varphi_q$  is the work function of the charged slab in the aqueous solution, and 4.60 V is the work function of the  $\text{H}_2/\text{H}^+$  couple at standard conditions. At a constant  $U_{\text{RHE}}$ , when the pH is varied by one unit, the  $U_{\text{SHE}}$  is shifted by 0.059 V. Thus, an electrode at pH = 13 and  $U_{\text{RHE}} = 0$  V has a  $U_{\text{SHE}} = -0.769$  V. The calculated electronic energy ( $E_{\text{elec}}$ ) of the charged system was then corrected for the interaction with the background charge as well as for the difference in the number of electrons in the system. For each structure, calculations were performed at charges of  $-0.500 |e|$  to  $+0.500 |e|$  with steps of  $+0.125 |e|$ . The electronic energy at the 9 charge values was then fit using a quadratic function to provide the electronic energy as a continuous function of  $U_{\text{SHE}}$ .

Finally, the calculated electronic energies were converted into free energies ( $G$ ), by adding zero-point energies (ZPE), and enthalpic ( $H$ ) and entropic ( $S$ ) contributions of adsorbates obtained from a harmonic oscillator at  $T = 298.15$  K. Free energy corrections for gaseous molecules were obtained

from the ideal gas approximation at  $T = 298.15$  K (Table S4). The computational hydrogen electrode (CHE) model was applied to calculate the free energy change ( $\Delta G$ ) of electrochemical steps in the RHE scale (*J. Phys. Chem. B* **2004**, *108*, 17886).

The occupied  $d$ -band center was calculated using the following equation:

$$\varepsilon_d^T = \frac{\int_{-\infty}^{E_F} E \rho_d(E) dE}{\int_{-\infty}^{E_F} \rho_d(E) dE}$$

where  $E$  is the energy relative to the Fermi level, and  $\rho_d(E)$  is the partial density of states projected

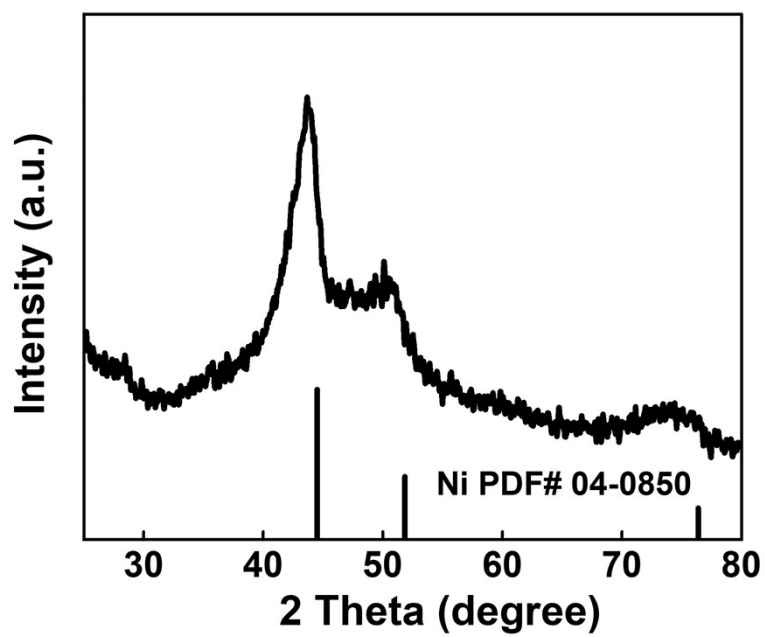

**Fig. S1** XRD pattern of Ni@IrNi.



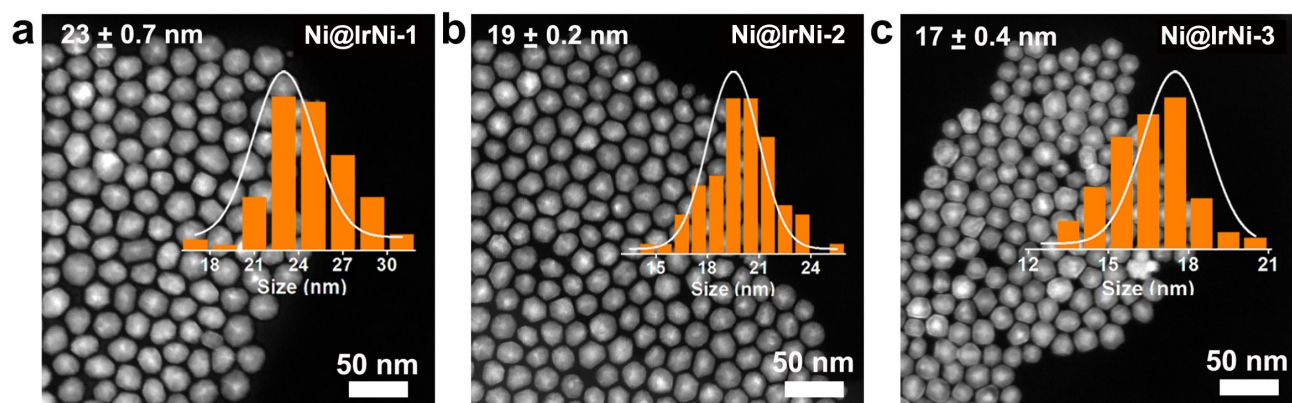

**Fig. S2** HAADF images of (a) Ni@IrNi-1, (b) Ni@IrNi-2 and (c) Ni@IrNi-3, the insets are the corresponding particle size distribution.

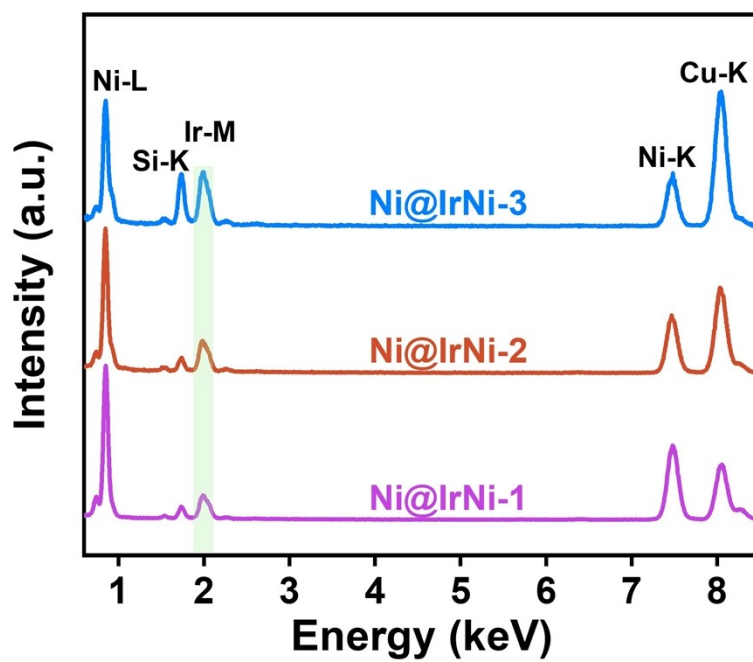

**Fig. S3** EDS spectra of Ni@IrNi-1, Ni@IrNi-2 and Ni@IrNi-3, the Si and Cu signals are from the Cu grid.

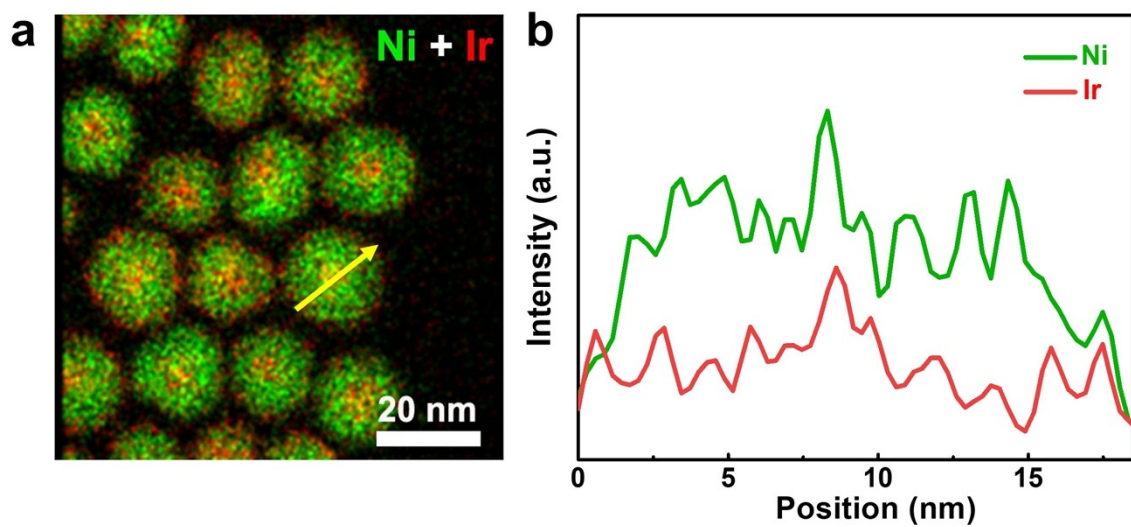

**Fig. S4** (a) EDS mapping of Ni@IrNi; (b) EDS elemental line profiles along the yellow arrow in (a)

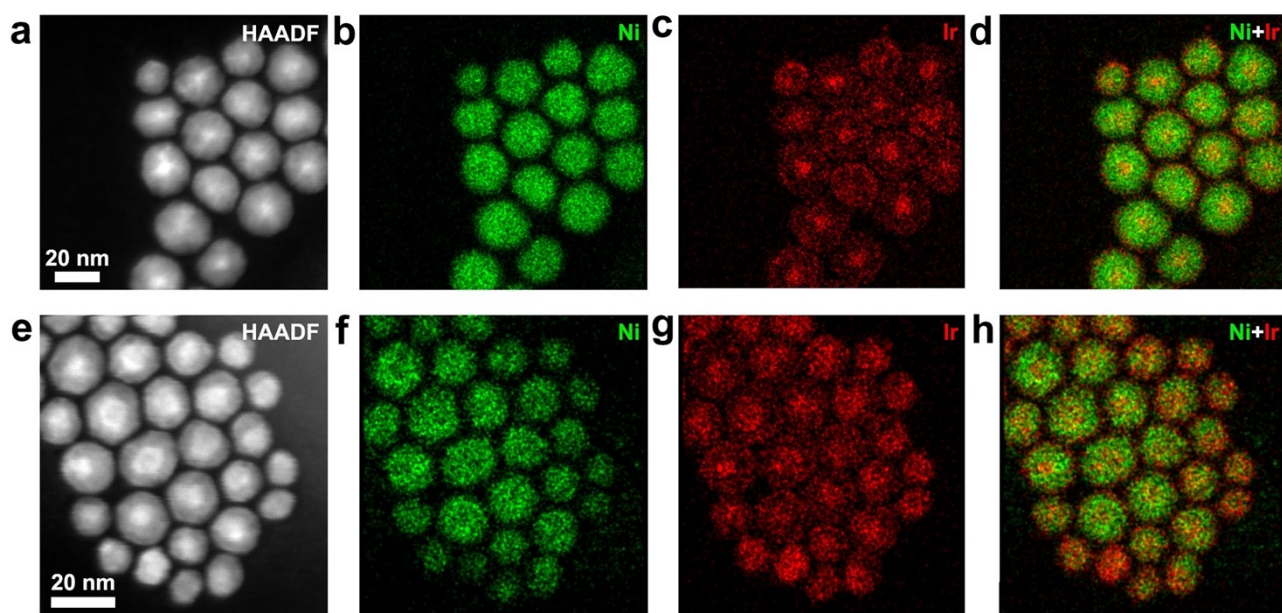

**Fig. S5** EDS elemental mapping of Ni and Ir in (a-d) Ni@IrNi-1 and (e-h) Ni@IrNi-3.

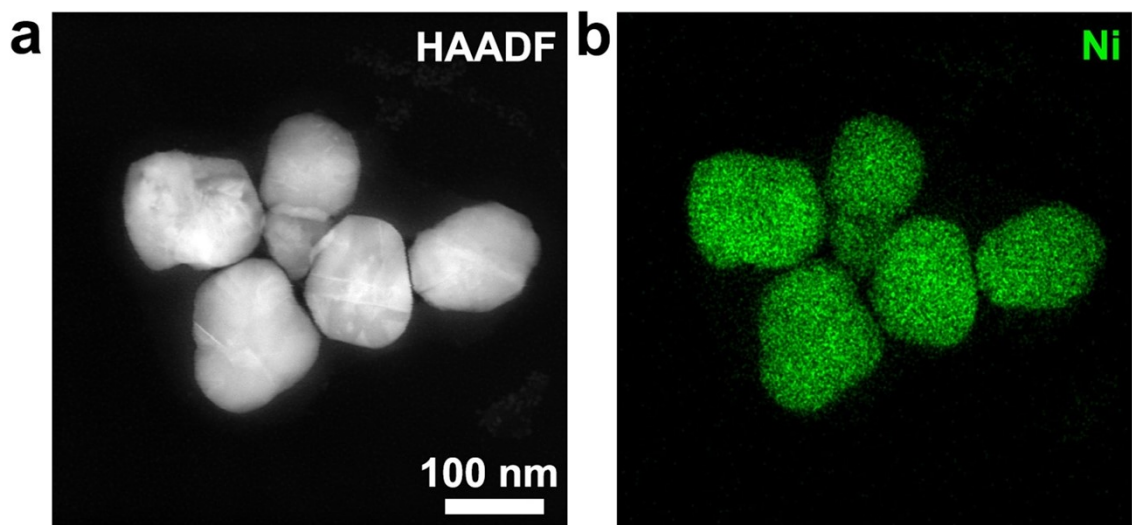

**Fig. S6** (a) HAADF image and (b) EDS elemental mapping of Ni nanoparticles.

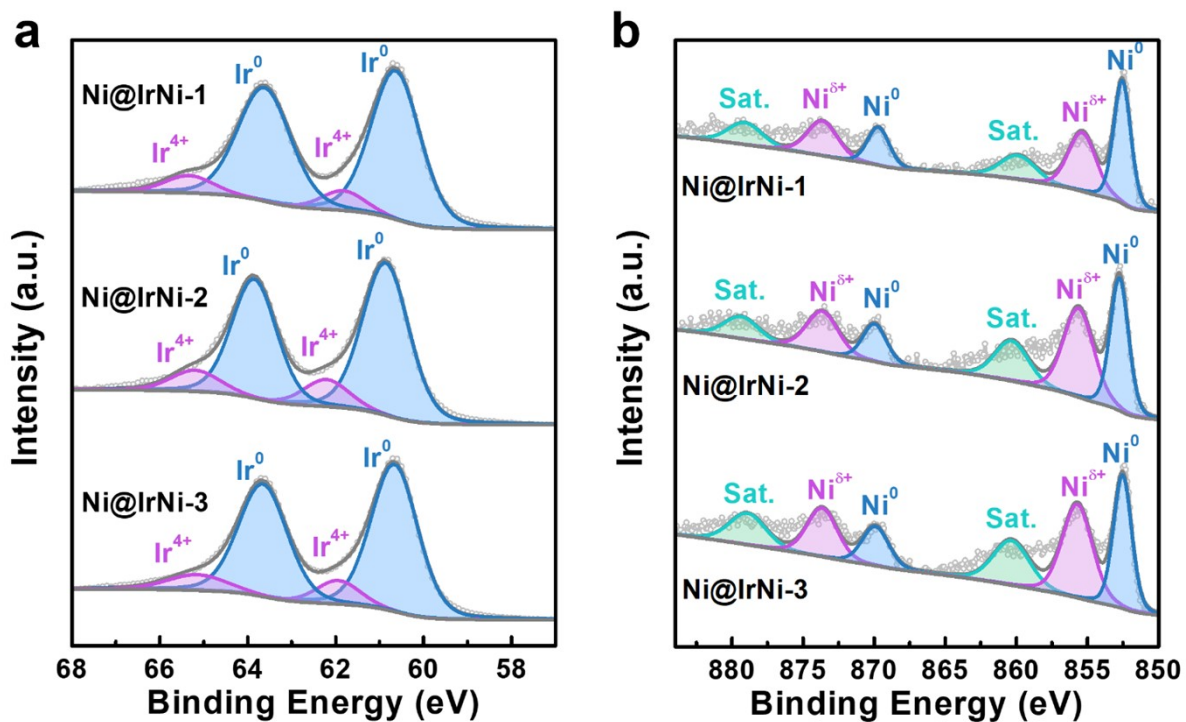

Fig. S7 (a) Ir 4f XPS and (b) Ni 2p XPS spectra of Ni@IrNi-1, Ni@IrNi-2, and Ni@IrNi-3.

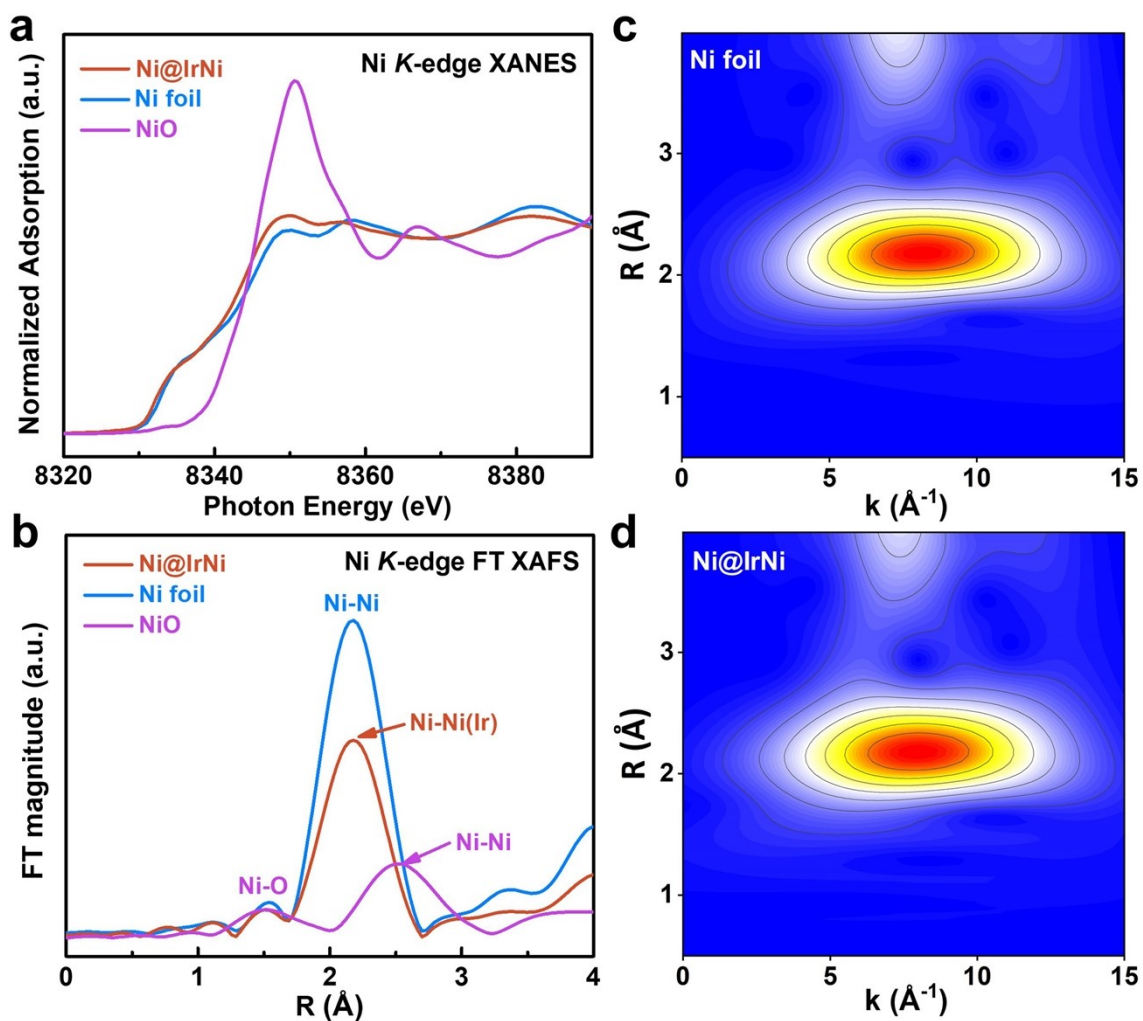

**Fig. S8** (a) Ni K-edge XANES spectra and (b) EXAFS spectra of Ni@IrNi in comparison with the Ni foil and NiO references. (c,d) Wavelet transform of the EXAFS spectra of (c) Ir foil and (d) Ni@IrNi.

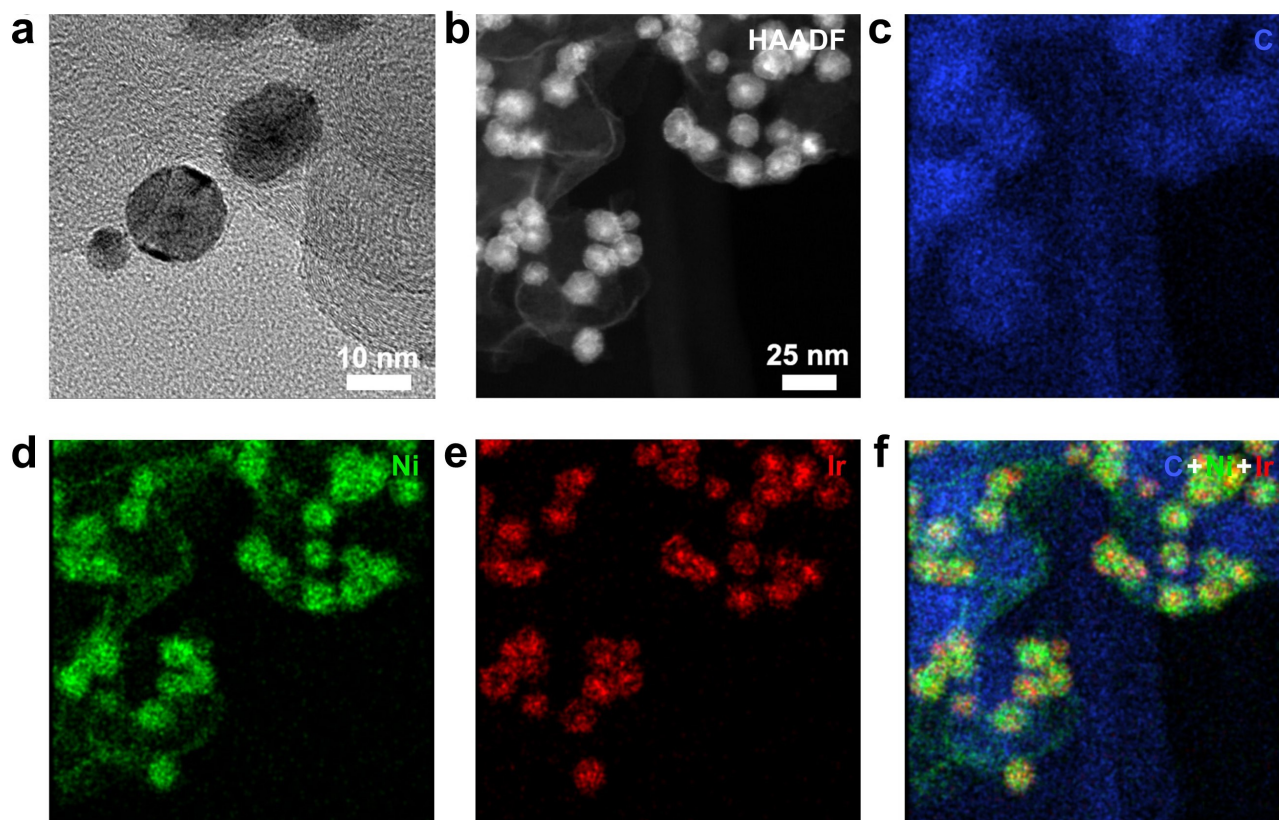

**Fig. S9** (a) TEM image and (b) HAADF image of Ni@IrNi loaded on KB. (c-f) EDS elemental mapping of C, Ni and Ir in Ni@IrNi loaded on KB.



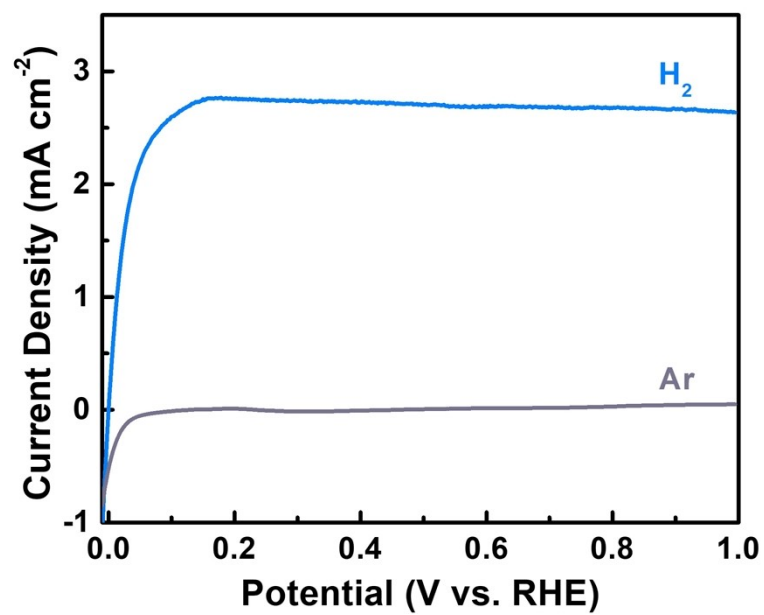

**Fig. S10** Polarization curves of Ni@IrNi in H<sub>2</sub>-saturated (blue) and Ar-saturated (grey) 0.1 M KOH at 1600 rpm.

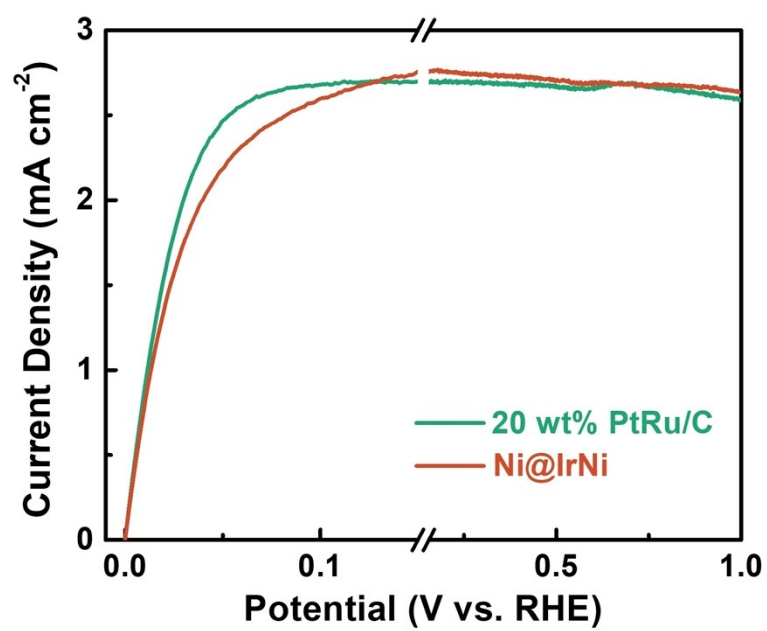

**Fig. S11** HOR polarization curves of Ni@IrNi and 20 wt% PtRu/C at 1600 rpm in H<sub>2</sub>-saturated 0.1 M KOH.

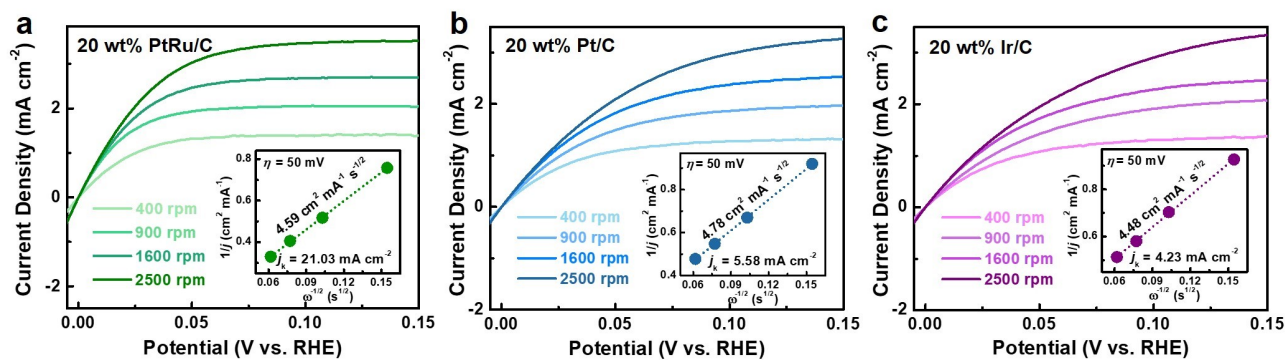

**Fig. S12** Polarization curves of (a) 20 wt% PtRu/C, (b) 20 wt% Pt/C and (c) 20 wt% Ir/C at different electrode rotation speeds; the insets are the corresponding Koutecky–Levich plots at  $\eta = 50$  mV.

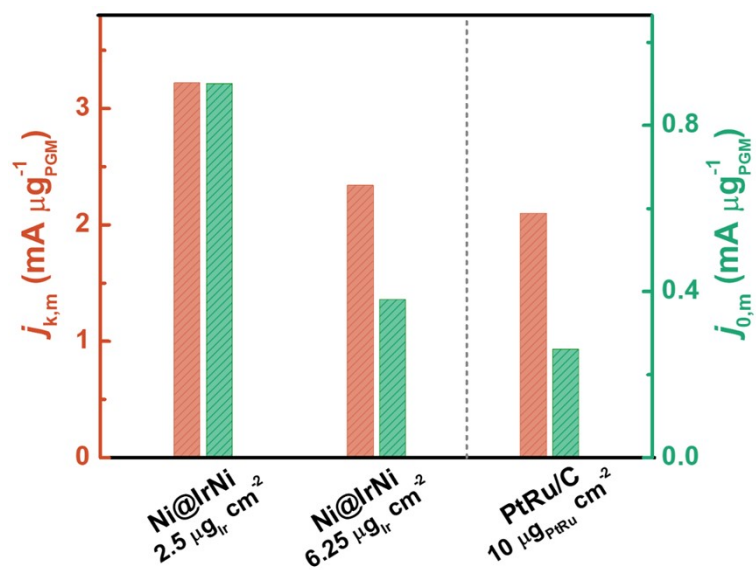

**Fig. S13** Comparison of the mass-specific kinetic current  $j_{k,m}$  and exchange current  $j_{0,m}$  of 20 wt% PtRu/C and Ni@IrNi.

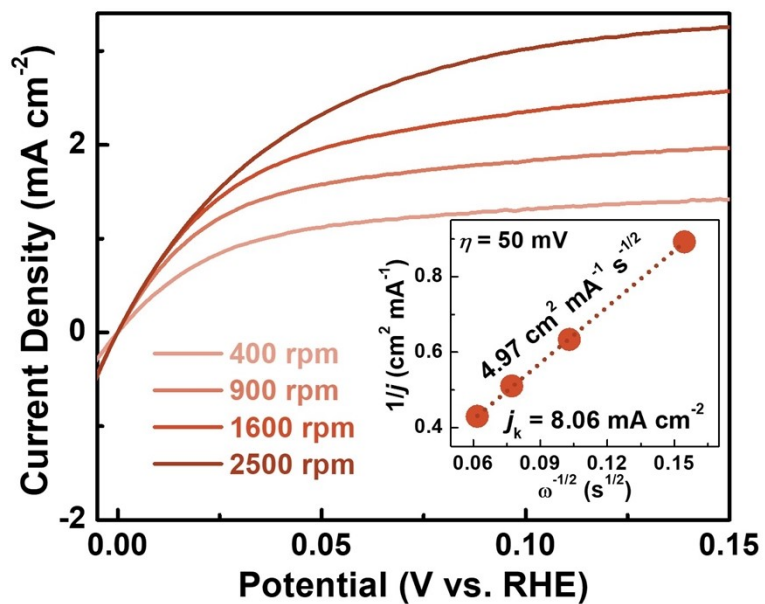

**Fig. S14** Polarization curves of Ni@IrNi with an Ir loading of  $2.5 \mu\text{g cm}^{-2}$  at different electrode rotation speeds, the inset is the corresponding Koutecky–Levich plot at  $\eta = 50 \text{ mV}$ .

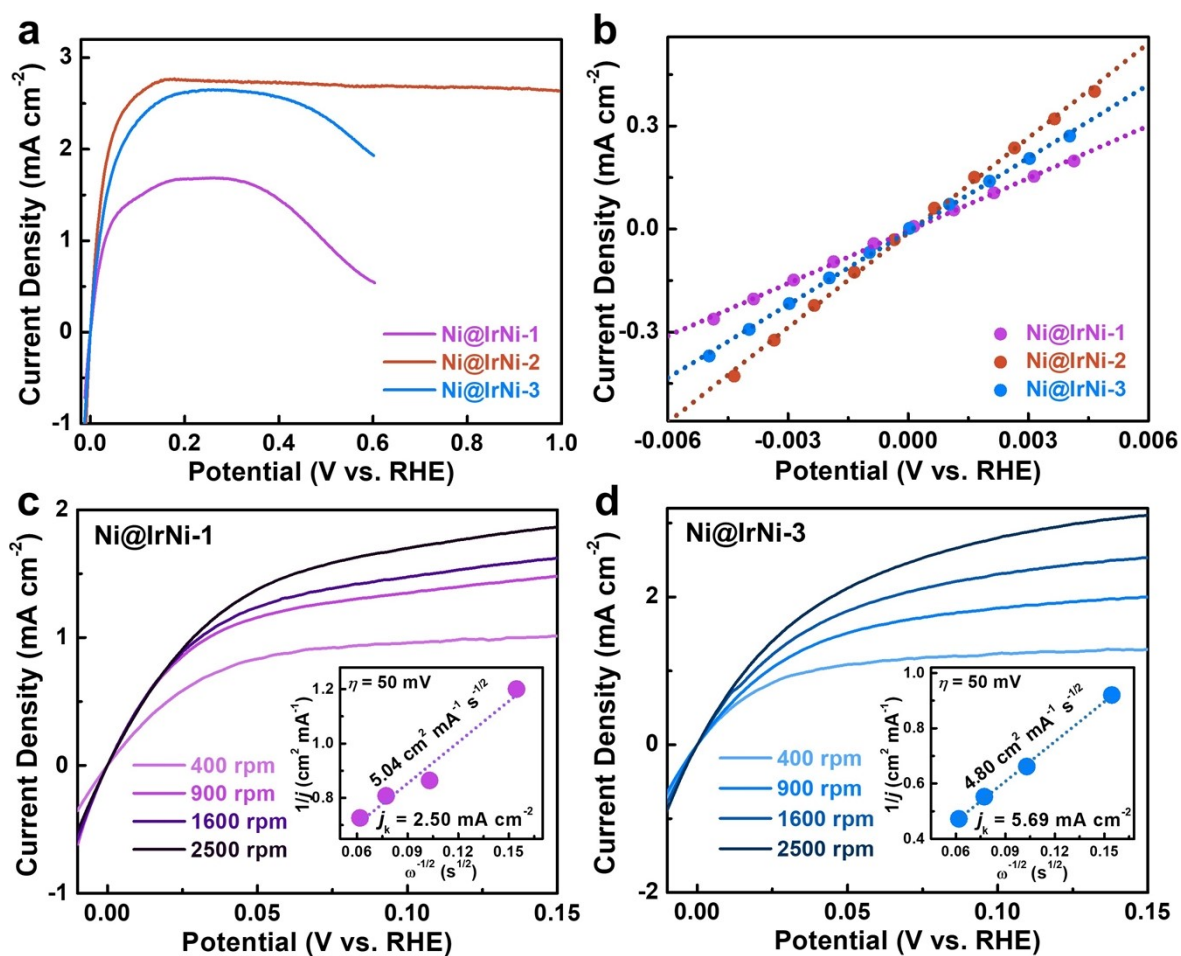

**Fig. S15** (a) Comparison of the HOR polarization curves of Ni@IrNi-1, Ni@IrNi-2 and Ni@IrNi-3 in H<sub>2</sub>-saturated 0.1 M KOH at 1600 rpm. (b) Micro-polarization curves of Ni@IrNi-1, Ni@IrNi-2 and Ni@IrNi-3 at 1600 rpm. (c,d) Polarization curves of (c) Ni@IrNi-1 and (d) Ni@IrNi-3 at different electrode rotation speeds; the insets are the corresponding Koutecky–Levich plot at  $\eta = 50$  mV.

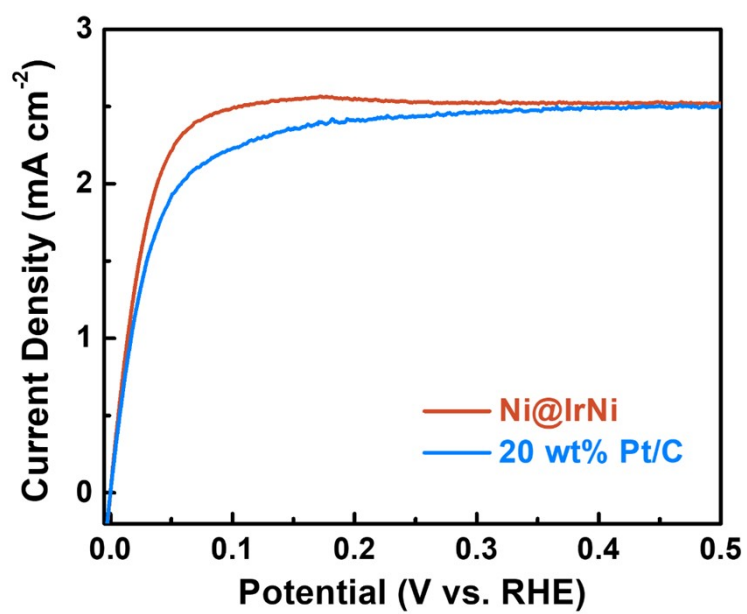

**Fig. S16** HOR RDE polarization curves of Ni@IrNi and 20 wt% Pt/C in H<sub>2</sub>-saturated 0.1 M PBS at 1600 rpm.

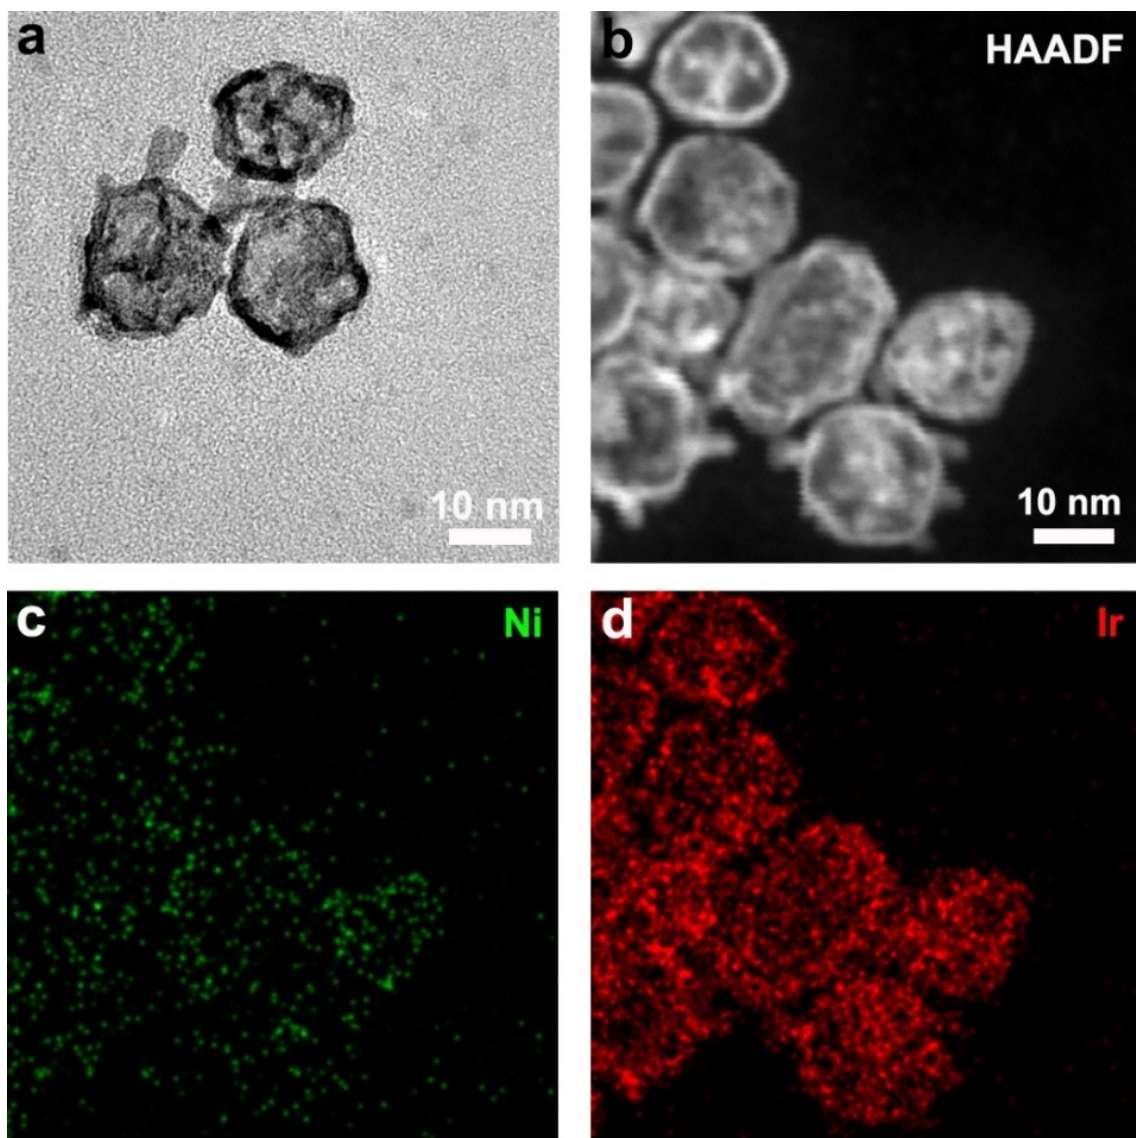

**Fig. S17** (a) TEM image, (b) HAADF-STEM image and (c-d) EDS elemental mapping of e-Ni@IrNi.



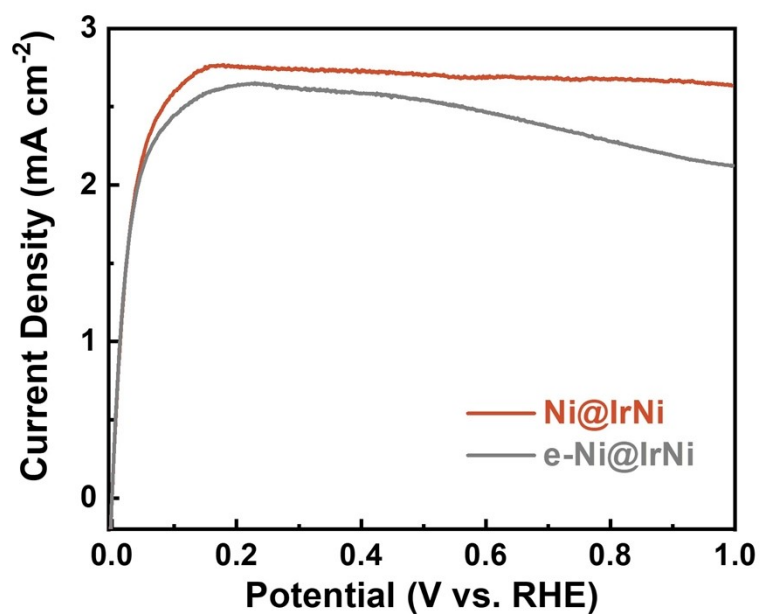

**Fig. S18** HOR polarization curves of e-Ni@IrNi and Ni@IrNi catalysts with the same Ir loading of 6.25  $\mu\text{g cm}^{-2}$  at 1600 rpm in H<sub>2</sub>-saturated 0.1 M KOH.

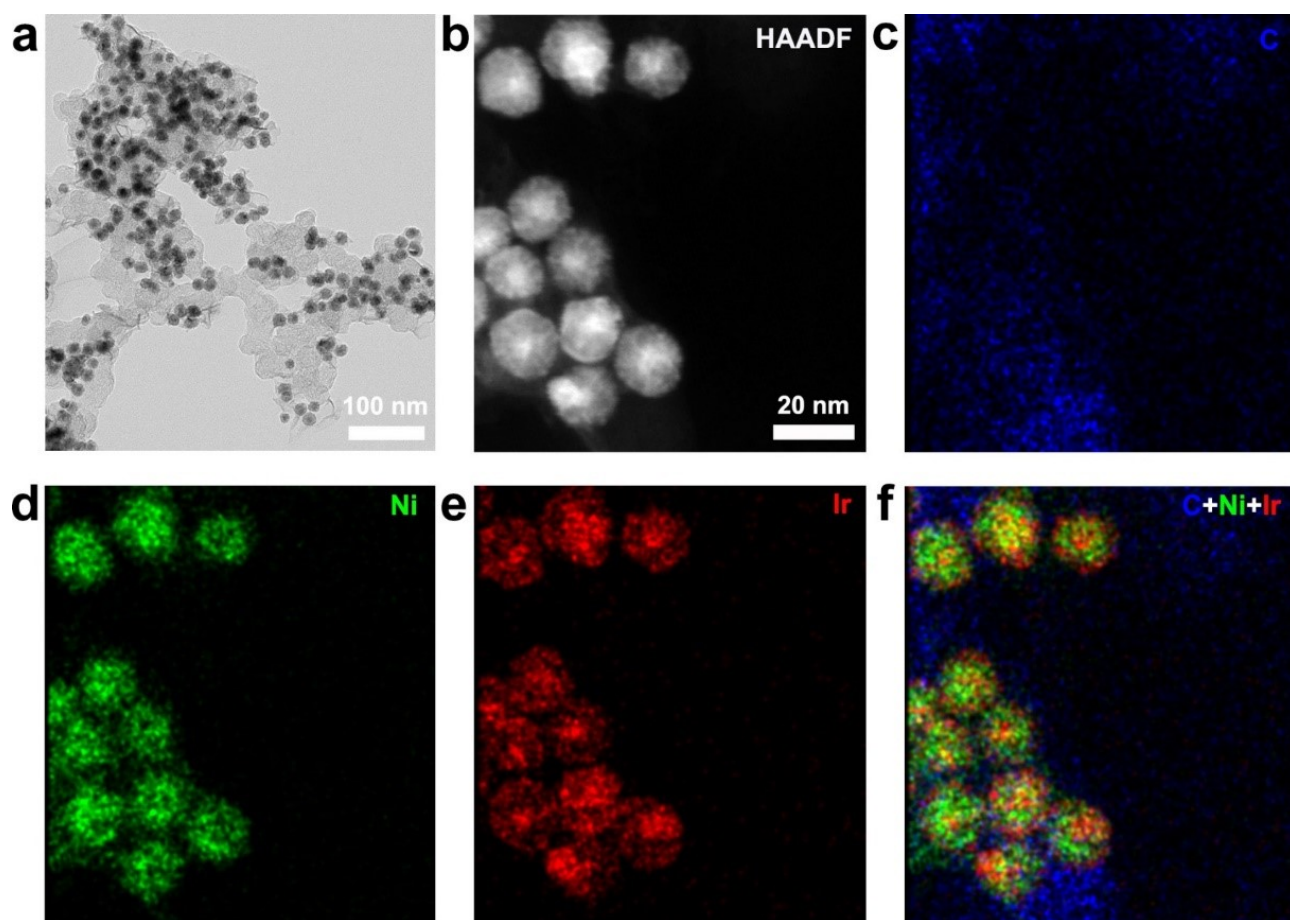

**Fig. S19** (a) TEM image, (b) HAADF image and (c-f) EDS elemental mapping of Ni@IrNi loaded on KB after the chronoamperometry test.

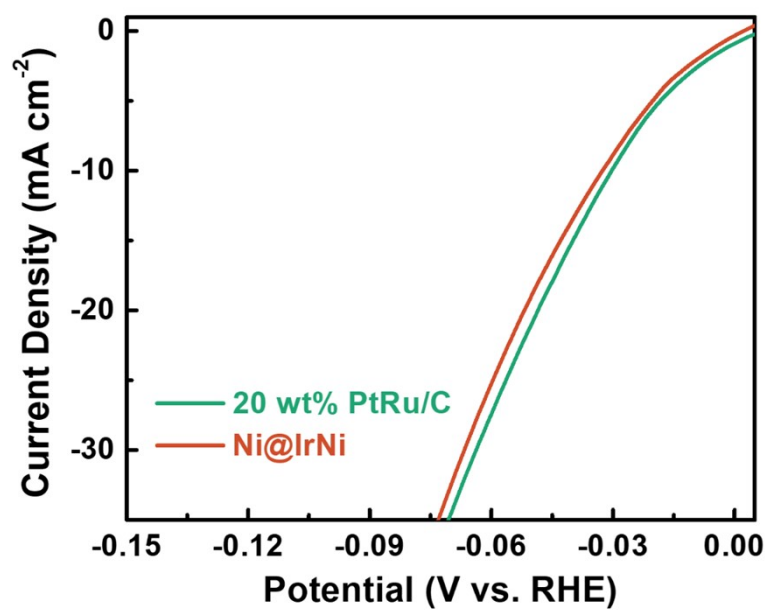

**Fig. S20** HER polarization curves of Ni@IrNi and 20 wt% PtRu/C in 1 M KOH.

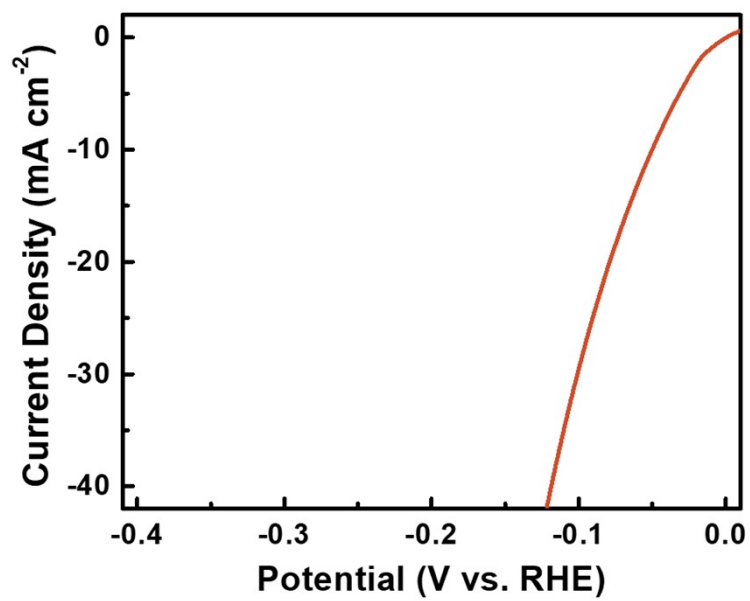

**Fig. S21** HER polarization curve of Ni@IrNi with an Ir loading of 2.5  $\mu\text{g}_{\text{Ir}} \text{cm}^{-2}$  in 1 M KOH.

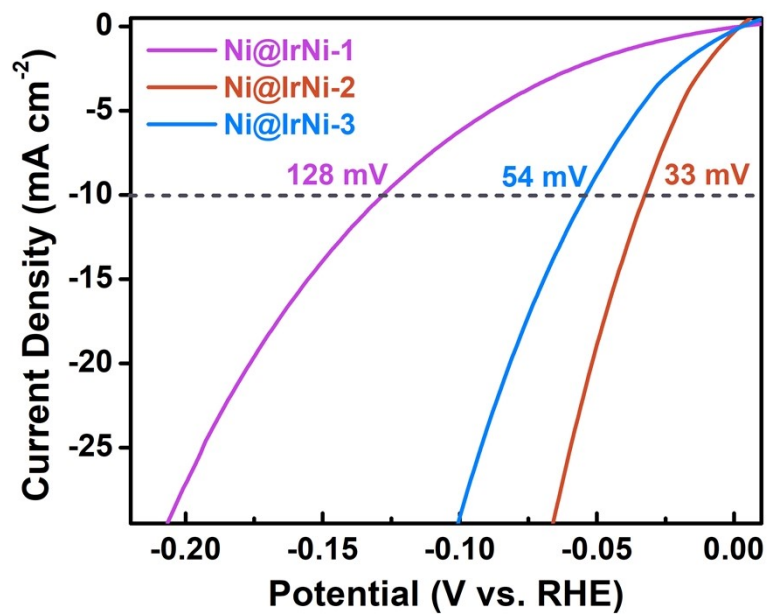

Fig. S22 HER polarization curves of Ni@IrNi-1, Ni@IrNi-2 and Ni@IrNi-3 in 1 M KOH.

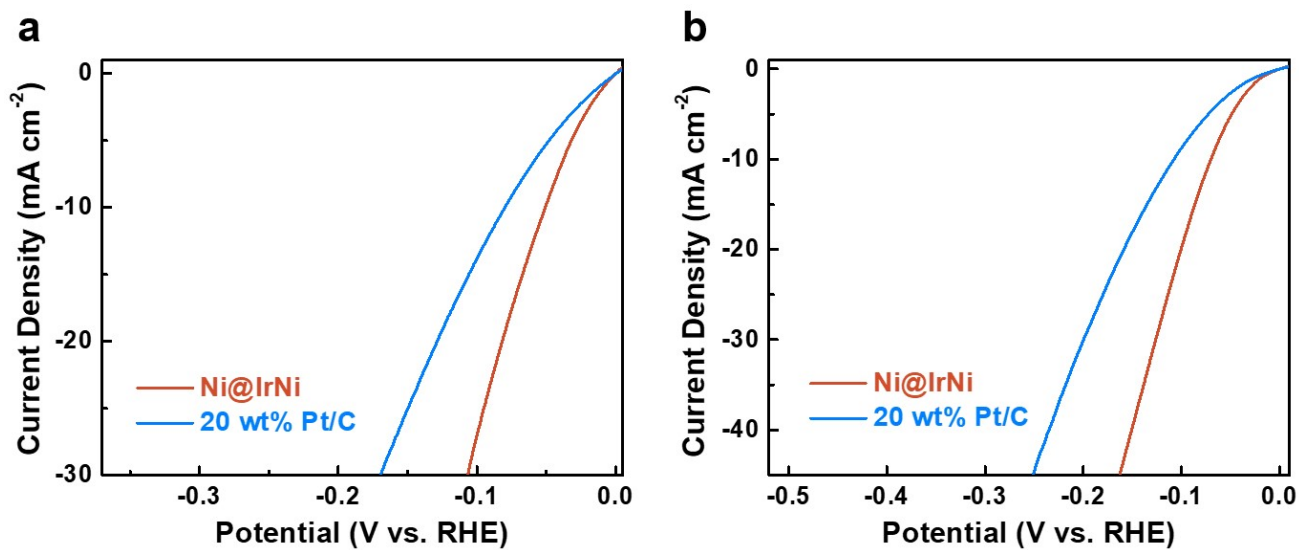

Fig. S23 HER polarization curves of Ni@IrNi and 20 wt% Pt/C in (a) 0.1 M KOH and (b) 1 M PBS.

**Table S1** EXAFS fitting parameters for Ir–Ni and Ir–Ir paths in Ni@IrNi.

| Sample  | Path  | $S_0^2$ | CN  | R(Å) | $\Delta E_0$ (eV) | $\sigma^2(10^{-3} \text{ \AA}^2)$ |
|---------|-------|---------|-----|------|-------------------|-----------------------------------|
| Ni@IrNi | Ir-Ni | 0.8     | 5.3 | 2.57 | 6.4               | 10.15                             |
|         | Ir-Ir | 0.8     | 4.6 | 2.67 | 6.4               | 3.53                              |

**Table S2** Comparison of the alkaline HOR activities of Ni@IrNi and other reported results.

| Catalysts                              | Loading <sub>PGM</sub><br>$\mu\text{g cm}^{-2}$ | $j_k$<br>$\text{mA cm}^{-2}$ | $j_{k,m}$<br>$\text{mA } \mu\text{g}^{-1}$ | $j_0$<br>$\text{mA cm}^{-2}$ | $j_{0,m}$<br>$\text{mA } \mu\text{g}^{-1}$ | Reference |
|----------------------------------------|-------------------------------------------------|------------------------------|--------------------------------------------|------------------------------|--------------------------------------------|-----------|
| Ni@IrNi                                | 6.25                                            | 14.54                        | 2.34                                       | 2.38                         | 0.381                                      | This work |
| Ni@IrNi                                | 2.50                                            | 8.06                         | 3.22                                       | 2.25                         | 0.901                                      | This work |
| Ni@IrNi-1                              | 3.45                                            | 2.50                         | 0.72                                       | 1.32                         | 0.383                                      | This work |
| Ni@IrNi-3                              | 8.58                                            | 5.69                         | 0.66                                       | 1.84                         | 0.215                                      | This work |
| 20 wt% PtRu/C                          | 10                                              | 21.03                        | 2.10                                       | 2.62                         | 0.262                                      | This work |
| 20 wt% Pt/C                            | 10                                              | 5.58                         | 0.56                                       | 1.50                         | 0.150                                      | This work |
| 20 wt% Ir/C                            | 10                                              | 4.23                         | 0.42                                       | 1.48                         | 0.148                                      | This work |
| Ru-Ru <sub>2</sub> P                   | 8.33                                            | -                            | 1.265                                      | -                            | 0.375                                      | [23]      |
| IrNi@Ir                                | 10                                              | -                            | 1.12                                       | 1.16                         | 0.116                                      | [24]      |
| IrNi@PdIr                              | 17.43                                           | 16.82                        | 0.965                                      | 0.209                        | 0.012                                      | [25]      |
| Ru NP/PC                               | 8.28                                            | 6.76                         | 0.816                                      | -                            | 0.263                                      | [26]      |
| Ru <sub>3</sub> Sn <sub>7</sub> /C     | 5.536                                           | -                            | 0.658                                      | -                            | 0.291                                      | [27]      |
| O-RuNi@C                               | 13.84                                           | -                            | 0.601                                      | 1.56                         | 0.113                                      | [28]      |
| Ir/MoS <sub>2</sub>                    | 11.5                                            | 6.45                         | 0.56                                       | -                            | 0.182                                      | [14]      |
| Ir ONAs                                | 30                                              | -                            | 0.387                                      | -                            | 0.08                                       | [12]      |
| Ni-Ir(BCS)/G                           | 31.8                                            | -                            | 0.33                                       | 2.86                         | 0.09                                       | [29]      |
| RuNi/NC                                | 25.25                                           | 5.59                         | 0.221                                      | 2.66                         | 0.105                                      | [30]      |
| Mo-Ru-2/C                              | 6                                               | -                            | 1.86                                       | 3.02                         | 0.503                                      | [31]      |
| Ir/Ni-NiO/CNT                          | 29.16                                           | -                            | 1.59                                       | 2.04                         | 0.070                                      | [32]      |
| Ir <sub>2</sub> Ni <sub>8</sub> /NHCSs | 10                                              | 5.35                         | 0.54                                       | -                            | 0.246                                      | [33]      |
| Ru/RuO <sub>2</sub> -180               | 20                                              | 45.62                        | 2.28                                       | 8.86                         | 0.443                                      | [34]      |
| PtMo/MoO <sub>x</sub> -1/C             | 9.43                                            | -                            | 3.19                                       | -                            | 0.406                                      | [35]      |
| PmPt@IrPd/C                            | 5                                               | -                            | -                                          | -                            | 0.743                                      | [36]      |



**Table S3** Comparison of the alkaline HER activities of Ni@IrNi and other reported results.

| Catalysts                 | Loading <sub>PGM</sub><br>$\mu\text{g cm}^{-2}$ | $\eta_{@j=10\text{ mA cm}^{-2}}$<br>mV | Reference |
|---------------------------|-------------------------------------------------|----------------------------------------|-----------|
| Ni@IrNi                   | 6.25                                            | 33                                     | This work |
| Ni@IrNi-1                 | 3.45                                            | 128                                    | This work |
| Ni@IrNi-3                 | 8.58                                            | 54                                     | This work |
| 20 wt% PtRu/C             | 10                                              | 30                                     | This work |
| 20 wt% Pt/C               | 10                                              | 72                                     | This work |
| 20 wt% Ir/C               | 10                                              | 80                                     | This work |
| IrSi                      | -                                               | 38                                     | [41]      |
| NiVIr                     | 608.8                                           | 41                                     | [42]      |
| Ir@N-G-750                | 11.5                                            | 43                                     | [43]      |
| Ru-MoS <sub>2</sub> /CNT  | 263.3                                           | 50                                     | [44]      |
| RuP <sub>2</sub> @NPC     | 233                                             | 52                                     | [45]      |
| Ru <sub>0.33</sub> Se@TNA | 59.6                                            | 57                                     | [46]      |
| Ru SAS-Ni <sub>2</sub> P  | 11                                              | 57                                     | [47]      |
| Ir-NCNSs                  | 7.6                                             | 125                                    | [48]      |
| Ru/Ni <sub>2</sub> P@NPC  | 6.82                                            | 132                                    | [49]      |

**Table S4** Free energy corrections for gaseous species at  $T = 298.15$  K.

| Species          | $p$<br>Pa | $E_{\text{elec}}$<br>eV | ZPE<br>eV | $-TS$<br>eV | $\int C_p dT$<br>eV | $G$<br>eV |
|------------------|-----------|-------------------------|-----------|-------------|---------------------|-----------|
| H <sub>2</sub> O | 3167      | -14.156                 | 0.566     | -0.673      | 0.103               | -14.160   |
| H <sub>2</sub>   | 100000    | -6.978                  | 0.269     | -0.403      | 0.090               | -7.023    |
